# Supplementary material for: Immunogenicity against wild-type and Omicron SARS-CoV-2 after a third dose of inactivated COVID-19 vaccine in healthy adolescents
Source: PubMed Central journal article supplement (PMC10026957; doi:10.3389/fimmu.2023.1106837), 2023-03-06
Supplement: DataSheet_1.pdf [file DataSheet_1.pdf]

## **Tables and Figures**

Supp. Tables 1-6

Supp. Figs. 1-5

### Supp Fig 1 Study completion diagram

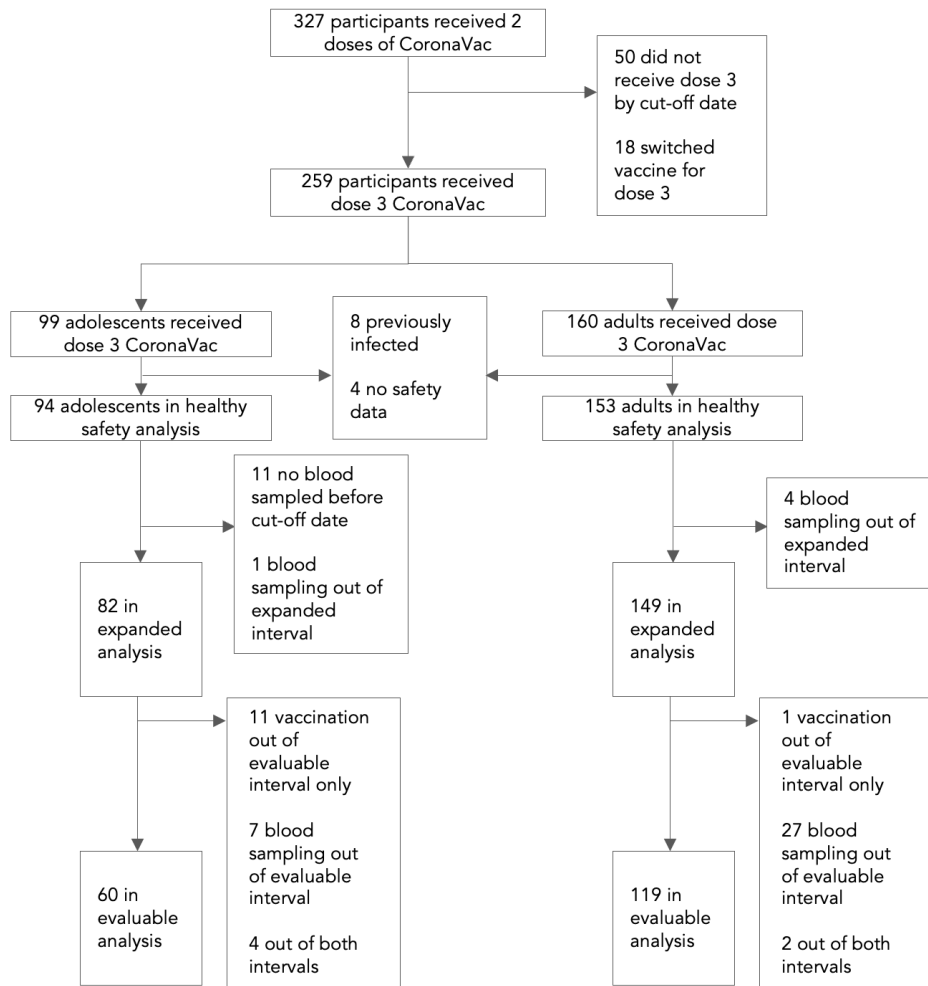

**Supp Fig 2 Longitudinal interferon- $\gamma$  (IFN- $\gamma$ )<sup>+</sup> and interleukin-2 (IL-2)<sup>+</sup> CD4<sup>+</sup> and CD8<sup>+</sup> T cells against separate wild-type SARS-CoV-2 Spike (S), Nucleocapsid (N) and Membrane (M) peptide pools in evaluable adolescents receiving 3 doses of CoronaVac**

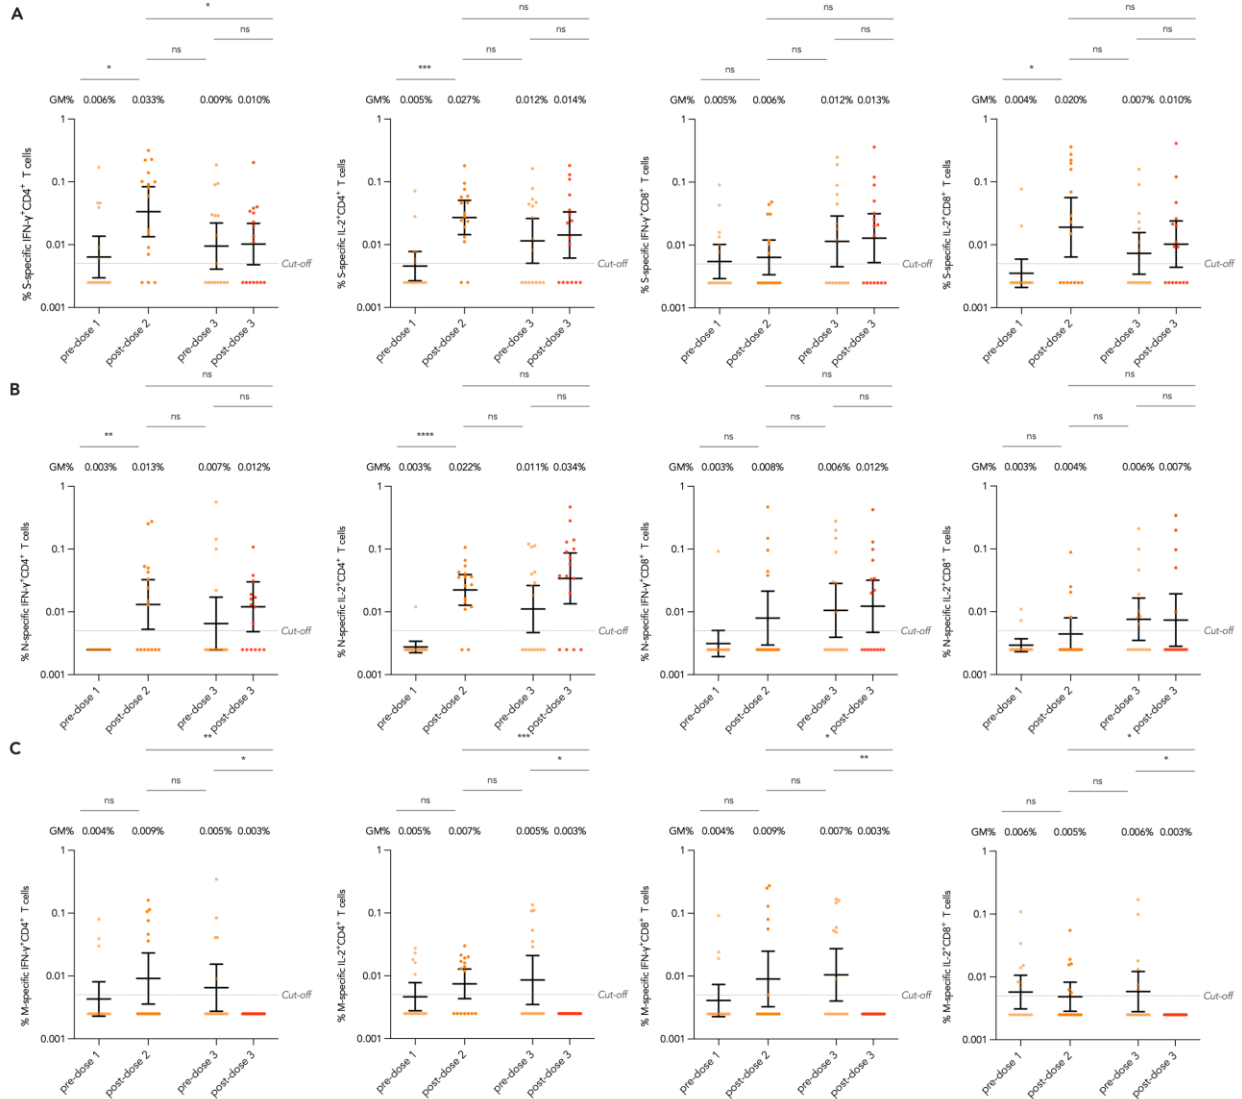

Geometric means (GM) are shown with centre lines and stated above each column, with corresponding 95% confidence intervals shown by error bars. Samples from the same participant were paired across timepoints and compared with paired t test after natural

logarithmic transformation with p-values denoted (\*,  $P < 0.05$ ; \*\*,  $P < 0.01$ ; \*\*\*,  $P < 0.001$ ; \*\*\*\*,  $P < 0.0001$ ; ns, not significant). Cut-offs are drawn as grey lines.

**Supp Fig 3 Non-inferiority hypothesis testing of humoral immunogenicity outcomes against wild-type SARS-CoV-2 after 3 doses of CoronaVac in expanded analysis population**

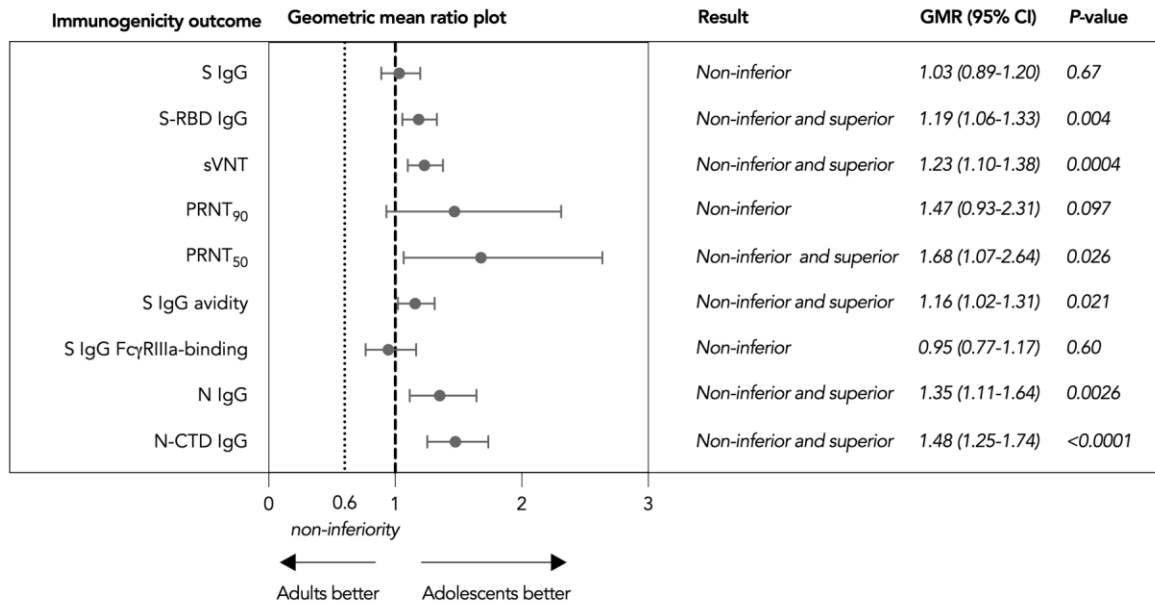

Non-inferiority tests of SARS-CoV-2 Spike (S) IgG, S-receptor binding domain (S-RBD) IgG, surrogate virus neutralization test (sVNT), plaque reduction neutralization test (PRNT), S IgG avidity, S IgG Fc $\gamma$  receptor IIIa (Fc $\gamma$ RIIIa)-binding, Nucleocapsid (N) IgG, and N-C-terminal domain (N-CTD) IgG were performed. Geometric mean ratios (GMR) and two-tailed 95% confidence intervals (CI) were plotted.

**Supp Fig 4 Non-inferiority hypothesis testing of separate wild-type SARS-CoV-2 Spike (S), Nucleocapsid (N) and Membrane (M) peptide pools specific cellular immunogenicity outcomes after 3 doses of CoronaVac in evaluable analysis population**

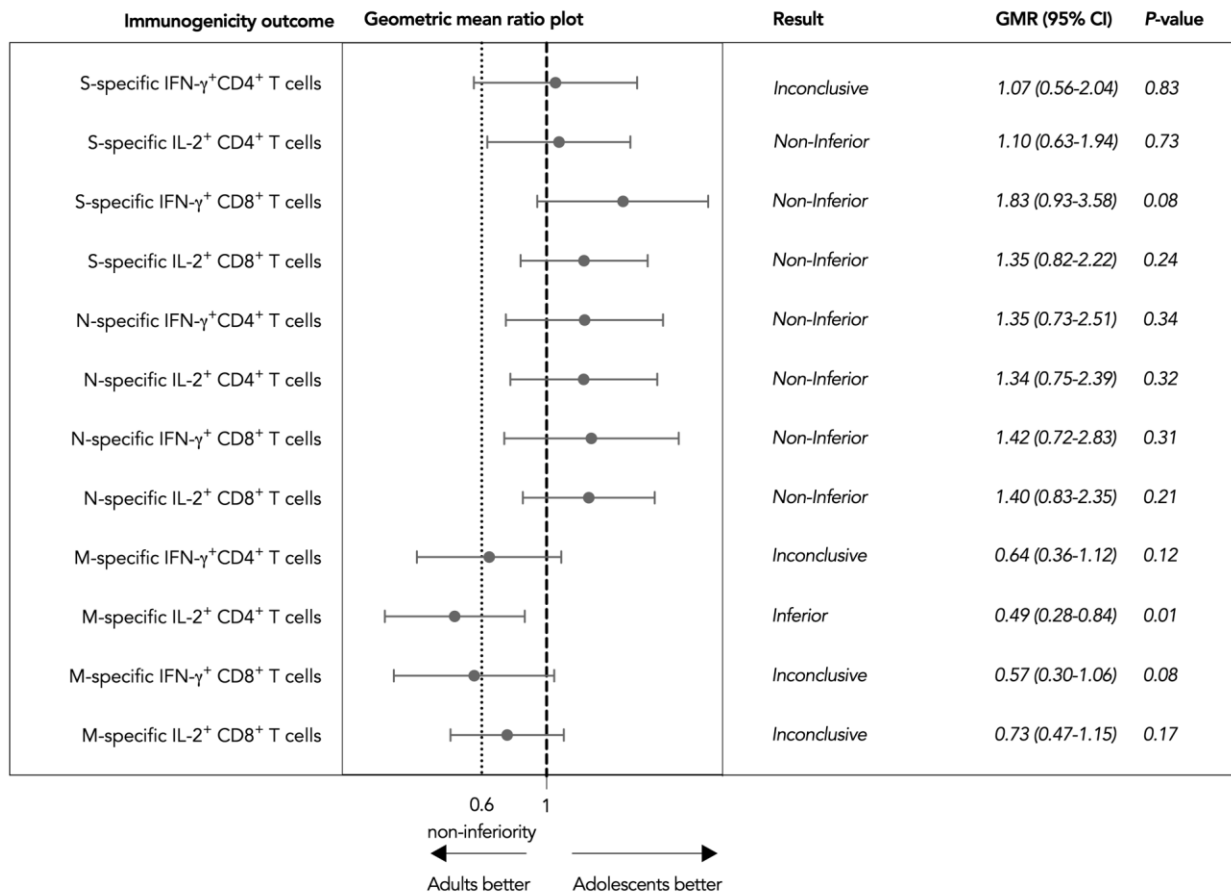

Non-inferiority testing of interferon- $\gamma$  (IFN- $\gamma$ )<sup>+</sup> and interleukin-2 (IL-2)<sup>+</sup> CD4<sup>+</sup> and CD8<sup>+</sup> T cells specific to separate S, N, and M peptide pools was performed. Geometric mean ratios (GMR) and two-tailed 95% confidence intervals (CI) were plotted.

**Supp Fig 5 Non-inferiority hypothesis testing of cellular immunogenicity outcomes after 3 doses of CoronaVac in expanded analysis population**

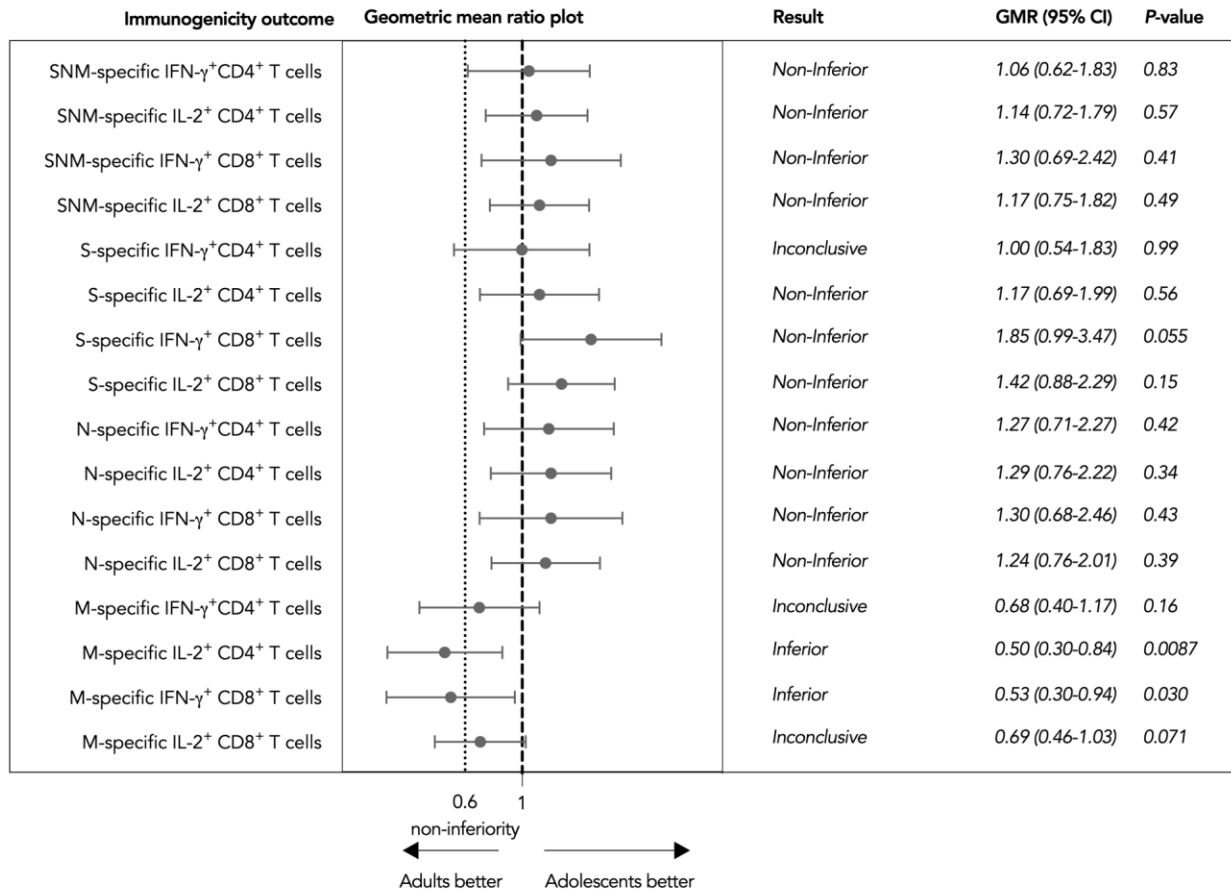

Non-inferiority testing of interferon- $\gamma$  (IFN- $\gamma$ )<sup>+</sup> and interleukin-2 (IL-2)<sup>+</sup> CD4<sup>+</sup> and CD8<sup>+</sup> T cells specific to total and separate Spike (S), Nucleocapsid (N), and Membrane (M) peptide pools was performed. Geometric mean ratios (GMR) and two-tailed 95% confidence intervals (CI) were plotted.

## SUPPLEMENTARY TABLES

| <b>Supp Table 1. Participant disposition in the healthy safety population.</b> |             |
|--------------------------------------------------------------------------------|-------------|
| <b>Healthy adolescents</b>                                                     |             |
| <b>Participants</b>                                                            | 94          |
| <b>Male sex</b>                                                                | 53 (56.4%)  |
| <b>Han Chinese</b>                                                             | 94 (100%)   |
| <b>Age (years)</b>                                                             | 14.2 (1.75) |
| <b>Healthy adults</b>                                                          |             |
| <b>Participants</b>                                                            | 153         |
| <b>Male sex</b>                                                                | 68 (44.4%)  |
| <b>Han Chinese</b>                                                             | 151 (98.7%) |
| <b>Age (years)</b>                                                             | 48.1 (8.01) |
| Values are either count (%) or mean (standard deviations).                     |             |



**Supp Table 2 Wild-type SARS-CoV-2 humoral immunogenicity outcomes after the third dose of CoronaVac in expanded analysis population**

|                                                                                                                                                                                                                                                                                                                                                                                                                                                                                                                                                                                                                                                                                       | Adolescents<br>3 doses | Adults<br>3 doses  |
|---------------------------------------------------------------------------------------------------------------------------------------------------------------------------------------------------------------------------------------------------------------------------------------------------------------------------------------------------------------------------------------------------------------------------------------------------------------------------------------------------------------------------------------------------------------------------------------------------------------------------------------------------------------------------------------|------------------------|--------------------|
| <b>S IgG on ELISA</b>                                                                                                                                                                                                                                                                                                                                                                                                                                                                                                                                                                                                                                                                 |                        |                    |
| N                                                                                                                                                                                                                                                                                                                                                                                                                                                                                                                                                                                                                                                                                     | 77                     | 60                 |
| GM OD450 value (95% CI)                                                                                                                                                                                                                                                                                                                                                                                                                                                                                                                                                                                                                                                               | 0.87 (0.78-0.97)       | 0.84 (0.76-0.94)   |
| % positive ( $\geq$ LOD at 0.3)                                                                                                                                                                                                                                                                                                                                                                                                                                                                                                                                                                                                                                                       | 97.4%, $P>0.9999$      | 98.3%              |
| <b>S-RBD IgG on ELISA</b>                                                                                                                                                                                                                                                                                                                                                                                                                                                                                                                                                                                                                                                             |                        |                    |
| N                                                                                                                                                                                                                                                                                                                                                                                                                                                                                                                                                                                                                                                                                     | 82                     | 149                |
| GM OD450 value (95% CI)                                                                                                                                                                                                                                                                                                                                                                                                                                                                                                                                                                                                                                                               | 1.69 (1.60-1.78)       | 1.42 (1.31-1.54)   |
| % positive ( $\geq$ LOD at 0.5)                                                                                                                                                                                                                                                                                                                                                                                                                                                                                                                                                                                                                                                       | 100%, $P=0.16$         | 96.6%              |
| <b>S-RBD ACE2-blocking antibody on sVNT</b>                                                                                                                                                                                                                                                                                                                                                                                                                                                                                                                                                                                                                                           |                        |                    |
| N                                                                                                                                                                                                                                                                                                                                                                                                                                                                                                                                                                                                                                                                                     | 82                     | 149                |
| GM % inhibition (95% CI)                                                                                                                                                                                                                                                                                                                                                                                                                                                                                                                                                                                                                                                              | 84.0% (81.0-87.1%)     | 68.3% (62.9-74.1%) |
| % positive ( $\geq$ LOQ at 30%)                                                                                                                                                                                                                                                                                                                                                                                                                                                                                                                                                                                                                                                       | 100%, $P=0.0088$       | 92.6%              |
| <b>Neutralizing antibody on PRNT</b>                                                                                                                                                                                                                                                                                                                                                                                                                                                                                                                                                                                                                                                  |                        |                    |
| N                                                                                                                                                                                                                                                                                                                                                                                                                                                                                                                                                                                                                                                                                     | 60                     | 25                 |
| GM PRNT <sub>90</sub> (95% CI)                                                                                                                                                                                                                                                                                                                                                                                                                                                                                                                                                                                                                                                        | 17.8 (13.7-23.3)       | 12.1 (8.86-16.6)   |
| % positive ( $\geq$ LOD at 10)                                                                                                                                                                                                                                                                                                                                                                                                                                                                                                                                                                                                                                                        | 78.3%, $P=0.58$        | 72.0%              |
| GM PRNT <sub>50</sub> (95% CI)                                                                                                                                                                                                                                                                                                                                                                                                                                                                                                                                                                                                                                                        | 55.3 (43.2-70.7)       | 32.9 (22.1-49.2)   |
| % positive ( $\geq$ LOD at 10)                                                                                                                                                                                                                                                                                                                                                                                                                                                                                                                                                                                                                                                        | 100%, $P=0.29$         | 96.0%              |
| <b>S IgG avidity on ELISA</b>                                                                                                                                                                                                                                                                                                                                                                                                                                                                                                                                                                                                                                                         |                        |                    |
| N                                                                                                                                                                                                                                                                                                                                                                                                                                                                                                                                                                                                                                                                                     | 75                     | 59                 |
| GM avidity index (95% CI)                                                                                                                                                                                                                                                                                                                                                                                                                                                                                                                                                                                                                                                             | 35.6% (32.5-39.1)      | 30.8% (28.4-33.4)  |
| <b>S IgG FcγRIIIa-binding on ELISA</b>                                                                                                                                                                                                                                                                                                                                                                                                                                                                                                                                                                                                                                                |                        |                    |
| N                                                                                                                                                                                                                                                                                                                                                                                                                                                                                                                                                                                                                                                                                     | 77                     | 60                 |
| GM OD450 value (95% CI)                                                                                                                                                                                                                                                                                                                                                                                                                                                                                                                                                                                                                                                               | 1.30 (1.14-1.49)       | 1.38 (1.16-1.64)   |
| % positive ( $\geq$ LOD at 0.28)                                                                                                                                                                                                                                                                                                                                                                                                                                                                                                                                                                                                                                                      | 97.4%, $P=0.65$        | 95.0%              |
| <b>N IgG on ELISA</b>                                                                                                                                                                                                                                                                                                                                                                                                                                                                                                                                                                                                                                                                 |                        |                    |
| N                                                                                                                                                                                                                                                                                                                                                                                                                                                                                                                                                                                                                                                                                     | 67                     | 25                 |
| GM OD450 value (95% CI)                                                                                                                                                                                                                                                                                                                                                                                                                                                                                                                                                                                                                                                               | 2.65 (2.42-2.90)       | 1.96 (1.58-2.43)   |
| % positive ( $\geq$ LOD at 0.88)                                                                                                                                                                                                                                                                                                                                                                                                                                                                                                                                                                                                                                                      | 97.0%, $P=0.30$        | 92.0%              |
| <b>N-CTD IgG on ELISA</b>                                                                                                                                                                                                                                                                                                                                                                                                                                                                                                                                                                                                                                                             |                        |                    |
| N                                                                                                                                                                                                                                                                                                                                                                                                                                                                                                                                                                                                                                                                                     | 67                     | 25                 |
| GM OD450 value (95% CI)                                                                                                                                                                                                                                                                                                                                                                                                                                                                                                                                                                                                                                                               | 2.82 (2.61-3.05)       | 1.91 (1.61-2.28)   |
| % positive ( $\geq$ LOD at 1.34)                                                                                                                                                                                                                                                                                                                                                                                                                                                                                                                                                                                                                                                      | 97.0%, $P=0.30$        | 92.0%              |
| S, spike protein; ELISA, enzyme-linked immunosorbent assay; GM, geometric mean; OD, optical density; LOD, limit of detection; LOQ, limit of quantification; CI, confidence interval; RBD, receptor-binding domain; ACE-2, angiotensin-converting enzyme-2; sVNT, surrogate virus neutralization test; PRNT, plaque reduction neutralization test; PRNT <sub>90</sub> , 90% plaque reduction neutralization titre; PRNT <sub>50</sub> , 50% plaque reduction neutralization titre; FcγRIIIa, Fc gamma receptor III-a; N, nucleocapsid protein; CTD, C-terminal domain. $P$ -values compare the proportion of positive responses between adolescents and adults by Fisher's exact test. |                        |                    |

**Supp Table 3 Wild-type SARS-CoV-2 separate S, N and M peptide pools specific cellular immunogenicity outcomes after the third dose of CoronaVac in evaluable analysis population**

|                                                                 | Adolescents<br>3 doses   | Adults<br>3 doses        |
|-----------------------------------------------------------------|--------------------------|--------------------------|
| <b>T cell responses</b>                                         |                          |                          |
| <b>S-specific T cell responses on flow cytometry</b>            |                          |                          |
| N                                                               | 59                       | 118                      |
| <b>GM</b> % IFN- $\gamma$ *CD4 <sup>+</sup> T cells<br>(95% CI) | 0.016%<br>(0.010-0.027%) | 0.015%<br>(0.010-0.022%) |
| % positive ( $\geq$ cut-off at 0.005%)                          | 57.6%, <i>P</i> =0.20    | 46.6%                    |
| <b>GM</b> % IL-2*CD4 <sup>+</sup> T cells<br>(95% CI)           | 0.017%<br>(0.011-0.027%) | 0.015%<br>(0.011-0.021%) |
| % positive ( $\geq$ cut-off at 0.005%)                          | 61.0%, <i>P</i> =0.52    | 55.1%                    |
| <b>GM</b> % IFN- $\gamma$ *CD8 <sup>+</sup> T cells<br>(95% CI) | 0.017%<br>(0.010-0.031%) | 0.009%<br>(0.006-0.014%) |
| % positive ( $\geq$ cut-off at 0.005%)                          | 49.2%, <i>P</i> =0.03    | 31.4%                    |
| <b>GM</b> % IL-2*CD8 <sup>+</sup> T cells<br>(95% CI)           | 0.009%<br>(0.006-0.015%) | 0.007%<br>(0.005-0.009%) |
| % positive ( $\geq$ cut-off at 0.005%)                          | 47.5%, <i>P</i> =0.20    | 37.3%                    |
| <b>N-specific T cell responses on flow cytometry</b>            |                          |                          |
| N                                                               | 58                       | 118                      |
| <b>GM</b> % IFN- $\gamma$ *CD4 <sup>+</sup> T cells<br>(95% CI) | 0.014%<br>(0.008-0.024%) | 0.010%<br>(0.007-0.015%) |
| % positive ( $\geq$ cut-off at 0.005%)                          | 53.5%, <i>P</i> =0.11    | 39.8%                    |
| <b>GM</b> % IL-2*CD4 <sup>+</sup> T cells<br>(95% CI)           | 0.020%<br>(0.012-0.033%) | 0.015%<br>(0.011-0.021%) |
| % positive ( $\geq$ cut-off at 0.005%)                          | 60.3%, <i>P</i> =0.42    | 53.4%                    |
| <b>GM</b> % IFN- $\gamma$ *CD8 <sup>+</sup> T cells<br>(95% CI) | 0.015%<br>(0.008-0.028%) | 0.010%<br>(0.007-0.015%) |
| % positive ( $\geq$ cut-off at 0.005%)                          | 41.4%, <i>P</i> =0.51    | 35.6%                    |
| <b>GM</b> % IL-2*CD8 <sup>+</sup> T cells<br>(95% CI)           | 0.010%<br>(0.006-0.016%) | 0.007%<br>(0.005-0.010%) |
| % positive ( $\geq$ cut-off at 0.005%)                          | 41.4%, <i>P</i> =0.62    | 36.5%                    |
| <b>M-specific T cell responses on flow cytometry</b>            |                          |                          |
| N                                                               | 59                       | 118                      |
| <b>GM</b> % IFN- $\gamma$ *CD4 <sup>+</sup> T cells<br>(95% CI) | 0.006%<br>(0.004-0.009%) | 0.009%<br>(0.006-0.013%) |
| % positive ( $\geq$ cut-off at 0.005%)                          | 23.7%, <i>P</i> =0.12    | 35.6%                    |
| <b>GM</b> % IL-2*CD4 <sup>+</sup> T cells<br>(95% CI)           | 0.006%<br>(0.004-0.009%) | 0.012%<br>(0.009-0.017%) |
| % positive ( $\geq$ cut-off at 0.005%)                          | 25.4%, <i>P</i> =0.006   | 47.5%                    |
| <b>GM</b> % IFN- $\gamma$ *CD8 <sup>+</sup> T cells<br>(95% CI) | 0.005%<br>(0.003-0.008%) | 0.009%<br>(0.006-0.013%) |
| % positive ( $\geq$ cut-off at 0.005%)                          | 13.6%, <i>P</i> =0.02    | 30.5%                    |
| <b>GM</b> % IL-2*CD8 <sup>+</sup> T cells<br>(95% CI)           | 0.005%<br>(0.003-0.006%) | 0.006%<br>(0.005-0.008%) |
| % positive ( $\geq$ cut-off at 0.005%)                          | 18.6%, <i>P</i> =0.07    | 32.2%                    |

S, Spike; N, Nucleocapsid; M, Membrane; GM, geometric mean; CI, confidence interval; IFN- $\gamma$ , interferon-gamma; IL-2, interleukin-2. *P*-values compare the proportion of positive responses between adolescents and adults by Fisher's exact test.

**Supp Table 4 Wild-type SARS-CoV-2 cellular immunogenicity outcomes after the third dose of CoronaVac in expanded analysis population**

|                                                                  | Adolescents<br>3 doses   | Adults<br>3 doses        |
|------------------------------------------------------------------|--------------------------|--------------------------|
| <b>T cell responses</b>                                          |                          |                          |
| <b>Total S, N, M-specific T cell responses on flow cytometry</b> |                          |                          |
| N                                                                | 69                       | 122                      |
| <b>GM</b> % IFN- $\gamma$ *CD4 <sup>+</sup> T cells<br>(95% CI)  | 0.068%<br>(0.045-0.104%) | 0.064%<br>(0.046-0.090%) |
| % positive ( $\geq$ cut-off at 0.01%)                            | 73.9%, <i>P</i> =0.20    | 63.9%                    |
| <b>GM</b> % IL-2*CD4 <sup>+</sup> T cells<br>(95% CI)            | 0.079%<br>(0.055-0.112%) | 0.069%<br>(0.052-0.091%) |
| % positive ( $\geq$ cut-off at 0.01%)                            | 81.2%, <i>P</i> =0.29    | 73.8%                    |
| <b>GM</b> % IFN- $\gamma$ *CD8 <sup>+</sup> T cells<br>(95% CI)  | 0.064%<br>(0.038-0.107%) | 0.050%<br>(0.034-0.072%) |
| % positive ( $\geq$ cut-off at 0.01%)                            | 59.4%, <i>P</i> =0.29    | 50.8%                    |
| <b>GM</b> % IL-2*CD8 <sup>+</sup> T cells<br>(95% CI)            | 0.039%<br>(0.026-0.057%) | 0.033%<br>(0.026-0.043%) |
| % positive ( $\geq$ cut-off at 0.01%)                            | 60.9%, <i>P</i> >0.9999  | 60.7%                    |
| <b>S-specific T cell responses on flow cytometry</b>             |                          |                          |
| N                                                                | 70                       | 122                      |
| <b>GM</b> % IFN- $\gamma$ *CD4 <sup>+</sup> T cells<br>(95% CI)  | 0.015%<br>(0.010-0.024%) | 0.015%<br>(0.011-0.022%) |
| % positive ( $\geq$ cut-off at 0.005%)                           | 54.3%, <i>P</i> =0.45    | 47.5%                    |
| <b>GM</b> % IL-2*CD4 <sup>+</sup> T cells<br>(95% CI)            | 0.018%<br>(0.011-0.027%) | 0.015%<br>(0.011-0.021%) |
| % positive ( $\geq$ cut-off at 0.005%)                           | 60.0%, <i>P</i> =0.65    | 55.7%                    |
| <b>GM</b> % IFN- $\gamma$ *CD8 <sup>+</sup> T cells<br>(95% CI)  | 0.017%<br>(0.010-0.029%) | 0.009%<br>(0.006-0.013%) |
| % positive ( $\geq$ cut-off at 0.005%)                           | 48.6%, <i>P</i> =0.02    | 31.2%                    |
| <b>GM</b> % IL-2*CD8 <sup>+</sup> T cells<br>(95% CI)            | 0.010%<br>(0.006-0.015%) | 0.007%<br>(0.005-0.009%) |
| % positive ( $\geq$ cut-off at 0.005%)                           | 45.7%, <i>P</i> =0.22    | 36.1%                    |
| <b>N-specific T cell responses on flow cytometry</b>             |                          |                          |
| N                                                                | 69                       | 122                      |
| <b>GM</b> % IFN- $\gamma$ *CD4 <sup>+</sup> T cells<br>(95% CI)  | 0.013%<br>(0.008-0.021%) | 0.010%<br>(0.007-0.015%) |
| % positive ( $\geq$ cut-off at 0.005%)                           | 50.7%, <i>P</i> =0.17    | 40.2%                    |
| <b>GM</b> % IL-2*CD4 <sup>+</sup> T cells<br>(95% CI)            | 0.019%<br>(0.012-0.029%) | 0.015%<br>(0.011-0.020%) |
| % positive ( $\geq$ cut-off at 0.005%)                           | 60.9%, <i>P</i> =0.36    | 53.3%                    |
| <b>GM</b> % IFN- $\gamma$ *CD8 <sup>+</sup> T cells<br>(95% CI)  | 0.013%<br>(0.008-0.023%) | 0.010%<br>(0.007-0.015%) |
| % positive ( $\geq$ cut-off at 0.005%)                           | 39.1%, <i>P</i> =0.64    | 35.3%                    |
| <b>GM</b> % IL-2*CD8 <sup>+</sup> T cells<br>(95% CI)            | 0.009%<br>(0.006-0.014%) | 0.007%<br>(0.005-0.010%) |
| % positive ( $\geq$ cut-off at 0.005%)                           | 37.7%, <i>P</i> =0.88    | 36.1%                    |
| <b>M-specific T cell responses on flow cytometry</b>             |                          |                          |
| N                                                                | 70                       | 122                      |
| <b>GM</b> % IFN- $\gamma$ *CD4 <sup>+</sup> T cells<br>(95% CI)  | 0.006%<br>(0.004-0.009%) | 0.009%<br>(0.007-0.013%) |
| % positive ( $\geq$ cut-off at 0.005%)                           | 25.7%, <i>P</i> =0.15    | 36.9%                    |
| <b>GM</b> % IL-2*CD4 <sup>+</sup> T cells<br>(95% CI)            | 0.006%<br>(0.004-0.009%) | 0.012%<br>(0.009-0.017%) |
| % positive ( $\geq$ cut-off at 0.005%)                           | 27.1%, <i>P</i> =0.006   | 48.4%                    |
| <b>GM</b> % IFN- $\gamma$ *CD8 <sup>+</sup> T cells<br>(95% CI)  | 0.005%<br>(0.003-0.007%) | 0.009%<br>(0.006-0.012%) |
| % positive ( $\geq$ cut-off at 0.005%)                           | 11.4%, <i>P</i> =0.004   | 29.5%                    |
| <b>GM</b> % IL-2*CD8 <sup>+</sup> T cells<br>(95% CI)            | 0.004%<br>(0.003-0.006%) | 0.006%<br>(0.005-0.008%) |
| % positive ( $\geq$ cut-off at 0.005%)                           | 15.7%, <i>P</i> =0.02    | 31.2%                    |

S, Spike; N, Nucleocapsid; M, Membrane; GM, geometric mean; CI, confidence interval; IFN- $\gamma$ , interferon-gamma; IL-2, interleukin-2. *P*-values compare the proportion of positive responses between adolescents and adults by Fisher's exact test.

**Supp Table 5. Unsolicited adverse events within 28 days of vaccination in adolescent healthy safety population.**

**Summary of adverse events and severe adverse events**

**Any adverse event** 1 (0.011)

**Grade 1** 1 (0.011)

**Grade 2** 0 (0.000)

**Grade 3** 0 (0.000)

**Severe** 0 (0.000)

N, total number of participants in adolescent healthy safety population.

Data are number of events (events per participant).

| <b>Supp Table 6. Peptide sequences of SARS-CoV-2 N and M BA.1 and wild-type reference mutation pools</b> |                           |                                 |
|----------------------------------------------------------------------------------------------------------|---------------------------|---------------------------------|
|                                                                                                          | <b>BA.1 mutation pool</b> | <b>Wild-type reference pool</b> |
| <b>SARS-CoV-2 Nucleocapsid protein</b>                                                                   |                           |                                 |
| P13L                                                                                                     | GPQNQRNAPRITFGG           | GPQNQRNALRITFGG                 |
| 31_33delERS                                                                                              | GSNQNGERSGARSKQ           | GSNQNGGARSKQ                    |
| 203_204delRGinsKR                                                                                        | STPGSSRGTSPARMA           | STPGSSKRTSPARMA                 |
| <b>SARS-CoV-2 Membrane protein</b>                                                                       |                           |                                 |
| D3G                                                                                                      | MADSNGTITVEELKK           | MAGSNGTITVEELKK                 |
| Q19E                                                                                                     | LLEQWNLVIGFLFLT           | LLEEWNLVIGFLFLT                 |
| A63T                                                                                                     | WLLWPVTLACFVLAA           | WLLWPVTLTCFVLAA                 |
